# Supplementary material for: Climate change triggers supply-chain losses that substantially exceed direct damages
Source: Research Square preprint supplement (doi:10.21203/rs.3.rs-7012657/v1), 2025-07-16
Supplement: Supplementary file 1 [file 5d945305825268801903097f.docx]

**Climate change triggers supply-chain losses that substantially exceed direct damages**

**Supplementary Information**

*Mengyu Li*, Manfred Lenzen**

*ISA, School of Physics A28, The University of Sydney, NSW 2006, Australia*

* Co-Corresponding author

Keywords: *climate change impacts; production disruption; supply chains.*

**Table of Contents**

[SI 1: Detailed methods 2](#_Toc201433109)

[*SI 1.1 Input-output analysis* 2](#_Toc201433110)

[*SI 1.2 Multi-region input-output disaster methods* 2](#_Toc201433111)

[*SI 1.3 Minimum-disruption disaster method* 4](#_Toc201433112)

[*SI 1.4 Constrained optimisation formalism* 5](#_Toc201433113)

[*SI 1.5 Parameter and assumptions space sweeped* 7](#_Toc201433114)

[*SI 1.6 Future crop yield assessments* 8](#_Toc201433115)

[*SI 1.7 Assessing production recipe flexibility* 11](#_Toc201433116)

[*SI 1.8 Producers’ and consumers’ losses – the total differential* 14](#_Toc201433117)

[*SI 1.9 Production layers* 14](#_Toc201433118)

[*SI 1.10 Structural paths* 15](#_Toc201433119)

[SI 2: Mixed- (1st- and 2nd-) order polynomial disruption function 16](#_Toc201433120)

[SI 3: Literature comparison 17](#_Toc201433121)

[SI 4: Supplementary results 18](#_Toc201433122)

[References 19](#_Toc201433123)

# SI 1: Detailed methods

## *SI 1.1 Input-output analysis*

Let an economy be described by an intermediate transactions matrix **T**, an input coefficients matrix , final demand **Y**, value added **V**, and total output , where is the so-called Leontief inverse, and **I** is a suitable identity matrix, and are suitable column summation operators of the form {1,1,…,1}, the prime ‘’ denotes vector and matrix transposition, is a suitable row summation operator of the form {1,1,…,1}, and the hat ‘^’ symbol denotes vector diagonalization. This economy is in equilibrium, when . Let be a compound input-output transactions matrix incorporating intermediate demand, final demand and value added. Let be a compound input coefficients matrix, the equivalent of **A** for **T** (see [1](#_ENREF_1)).Define an diagonal matrix of sectoral production losses, where the describe the fractional loss of production of sector . Define {} as the post-disaster quantities of {}.

## *SI 1.2 Multi-region input-output disaster methods*

A prominent method for investigating cascading spill-over effects of disasters is (multi-region) input-output (MRIO) analysis.[2](#_ENREF_2) This research stream has a long-standing tradition[3-5](#_ENREF_3). As an example for climate-change-related impacts, a number of researchers[6-11](#_ENREF_6) have investigated the economic impacts of floods.

Natural disasters and other large-scale shocks often impose severe constraints on the availability of essential inputs for economic production. When production technologies are characterized by fixed input coefficients (**A** in *SI* 1.1), the consequences of such shocks can be especially acute. In a Leontief framework (**L** in *SI* 1.1), inputs are required in strict proportions, and the absence or reduction of any one input leads to a directly proportional reduction in output, as substitution between inputs is not possible[12](#_ENREF_12). This rigidity implies that the economy cannot reallocate resources flexibly to buffer the impact of the shock, leading to what can be described as a proportionally shrunken economy[13](#_ENREF_13),[14](#_ENREF_14).

Under disaster conditions, supply chain disruptions, labour force displacement, and infrastructure damage may render key inputs partially or wholly unavailable.[15](#_ENREF_15) For example, if electricity supply is curtailed or transportation infrastructure is damaged, industries that depend on these services are unable to operate at full capacity, regardless of the availability of other inputs such as labour or raw materials. In such scenarios, the fixed production structure ensures that even minor disruptions in critical inputs can cascade through the production network, causing systemic reductions in economic output.[3](#_ENREF_3),[16](#_ENREF_16) The concept of a proportionally shrunken economy is thus a direct result of both the physical constraints imposed by disasters and the structural characteristics of input-output relationships. Input-output models, which are well-suited to capturing these interdependencies, consistently show that in the presence of non-substitutability, losses in input supply translate into proportionate losses in sectoral and aggregate output.[17](#_ENREF_17)

In input-output (IO) disaster modelling, a persistent issue is the risk of excessive cascading effects due to the fixed production recipe assumption. Early approaches[14](#_ENREF_14) attempted to address disaster shocks by allocating all production losses to final demand. This removed disrupted outputs without triggering inter-industry feedbacks but often produced negative final demand values – interpreted as calls for external aid rather than internal economic responses. Later models[16](#_ENREF_16),[18](#_ENREF_18) introduced constraints to prevent such negative final demand. Instead of forcing unrealistic consumption reductions, they redirected the burden of losses into intermediate demand. This better captured supply-chain disruptions, but with fixed technical coefficients, it often led to amplified ripple effects and proportional shrinkage across sectors. To mitigate this, Schulte in den Bäumen[16](#_ENREF_16) introduced a methodological refinement: the elimination of marginal input coefficients (those contributing minimally to output). By excluding weak interdependencies, this reduced excessive knock-on effects and helped contain the size of the disrupted economic network, limiting cascading impacts. In these frameworks, final demand was stressed to the greatest extent possible, under the rationale that losses to intermediate demand could propagate through production chains and induce cascading effects that – because of the fixed production recipe – amplify economic damage and lead to a proportionally shrunken economy.

Oosterhaven and Bouwmeester[19](#_ENREF_19),[20](#_ENREF_20) emphasized that future disaster IO analyses should allow for flexibility and substitution in production. They critiqued the rigidity of standard IO assumptions and called for more behaviourally realistic models. Similarly, the European Central Bank[21](#_ENREF_21) acknowledged that global IO linkages amplify climate-related physical risks but also advocated for incorporating substitution to reflect real-world adaptive capacities.

Li *et al*.[13](#_ENREF_13) (used in this work) take a concrete step in this direction by introducing production recipe flexibility into the IO framework. Their model allows sectors to partially substitute inputs in response to shocks, thereby softening the impact of upstream disruptions and avoiding the unrealistic, proportionally shrunken economy typical of fixed-coefficient models. This methodological evolution marks an advance toward better reflecting economic resilience and adaptive behaviour in disaster contexts. The model has been validated in a case study of Venezuela.[13](#_ENREF_13)

## *SI 1.3 Minimum-disruption disaster method*

In this work we use an advanced, flexible disaster-analysis approach[13](#_ENREF_13) that allows incorporating human decisions, such as prioritising parts of the economy that need to be shielded from the disaster, and accounting for input substitutability (see the research gap identified by the European Central Bank[21](#_ENREF_21)). This approach assumes a tendency of the economy to strive for minimum-disruption[22](#_ENREF_22),[23](#_ENREF_23), by establishing post-disaster transactions that are as close as possible to pre-disaster equivalents , subject to penalty weights. Proops and co-workers[24](#_ENREF_24) define a symmetrical quadratic disruption function , penalising losses and gains equally. This does however not conform with the well-known loss aversion principle: Losses should receive a higher penalty that gains[25](#_ENREF_25). We therefore define a mixed- (1st- and 2nd-) order polynomial disruption function

with  , with

and with (1)

that consists of a quadratic pure-disruption term, and a negative-linear loss-aversion term (*SI* 2). The are decision-maker’s priority weights[13](#_ENREF_13): large characterise inflexible transactions that, when affected, would cause significant social disruption, and that therefore a decision-maker does not wish to be altered when moving to the post-disaster equilibrium. Examples for such inflexible transactions are domestic food, water and energy supply, or health services. Small characterise non-essential and therefore adjustable transactions such as gambling or entertainment services. Food exports may also attract a small weight, because in case of a disaster affecting food production (for example a cyclone), a government may decide to curtail food exports for the sake of safeguarding the local population. Through these weights, disaster-borne changes attract a more or less high penalty in the disruption function .

The priority horizon is another subjective decision variable that controls the nature of the penalty function, in that penalty is exerted on relative changes for , on absolute changes for , and on intermediate variants for . When , every region, even small ones, look after not disrupting their own economy with priority; when , all regions prefer not disrupting large and important transactions, irrespective of the region in which they are completed. The practical consequences of setting are that for , large changes for small countries would be avoided, but not for . The loss aversion is a subjective decision variable that controls the asymmetry shape of the penalty, asymptotically ranging from for symmetrical disruption[24](#_ENREF_24) to for negative-linear loss aversion. For non-zero , is negative for small gains as required, and asymmetrical, where the asymmetry is more pronounced for important transactions (those attracting a large priority weight *w*; Fig. *SI* 2.1). For non-zero , losses always receive a higher penalty that gains, thus reflecting the pertinent literature.[25](#_ENREF_25)

## *SI 1.4 Constrained optimisation formalism*

The post-disaster economy is then determined by minimising disruption as

. (2)

subject to the following five conditions (compare with Refs [20](#_ENREF_20),[[1]](#footnote-1)):

1. *Loss of production output*: For every sectorwe ask that post-disaster production possibilities are bound by, where is the relative production loss of sector [26](#_ENREF_26), and is the relative remaining productive capacity of sector . Negative values of can be used to simulate slack capacity that can be mobilised to compensate losses elsewhere (see Fig. *SI* 1.5.1).
2. *Equilibrium*: The post-disaster economy {} is in a new equilibrium, leading to the *sectoral input-output balance*  .[14](#_ENREF_14)
3. *Country-wise trade balance*:As an optional constraint, we allow imposing a trade balance condition, to reflect cases where a country may not be able to increase its trade deficit in the short term. The trade balance constraint then becomes, where **m** and **e** are imports and exports vectors, respectively, and the index *k* runs over countries or regions.
4. *Non-negative transactions*: Except for items such as net taxes, subsidies, and changes in inventories, all input-output transactions shall be non-negative: ; , .
5. *Aggregate production recipe constancy*: A major innovation in our approach responds to the European Central Bank’s[21](#_ENREF_21) future research agenda in representing post-disaster input substitutability. Let be a rectangular concordance matrix connecting substitutes, that is for all products that are alternative choices of inputs for an aggregate product , and otherwise[27](#_ENREF_27). In a multi-regional context, products can be sectors producing the same product in different countries. is then a compressed input coefficients matrix, distinguishing *K* un-substitutable aggregate inputs into sectors. Whilst imposing constancy of **B** would fix every individual input coefficient, requiring to be constant () allows for input substitution during the adjustment to post-disaster conditions. Asking that provides further flexibility in that not only input coefficients can be altered within the limits of the , but marginal inputs smaller than can be omitted from the production recipe altogether. Note that and include value added and final demand, and thus the condition encompasses substitution of labour for intermediate inputs, and final demand structure.

Our minimum-disruption approach (Eq. 1) follows – at least in principle, and despite not being purely quadratic – Oosterhaven’s approach[20](#_ENREF_20), in that “*economic actors try to maintain their pre-disaster pattern of economic transactions*”. However, we do not use their Kullback-Theil information measure because, as a common error function (for example used in estimating large input-output frameworks[28-30](#_ENREF_28), a quadratic or polynomial form is free of singularities and differentiable over its entire definition space[31](#_ENREF_31). This choice becomes important practically when configuring a large-scale solver for Eq. 2 and its constraints, because these solvers perform at much improved runtimes when informed with the gradients and Hessians of the objective function and nonlinear constraints. For this reason, we have also specified the aggregate production recipe constancy as .

## *SI 1.5 Parameter and assumptions space sweeped*

In our modelling exercise, we sweep a 7-dimensional variable space, as follows:

1. direct hits as in Ref. {Li, 2025 #7467} and concurrency of losses, ie the standard deviations .
2. decision priority weights (see Eq. 1 above); setting priority weights allows shielding specific transactions from changing during the minimum-disruption optimisation.
3. slack capacity (Fig. *SI* 1.5); non-zero slack capacity assumes that stockpiles can be accessed in case of a disaster.
4. production recipe flexibility (see constraint v. above and data in Fig. *SI* 1.7); a non-zero production recipe flexibility allows producers to alter their intermediate and primary input structures, including the proportions of labour and capital in total inputs.
5. substitution possibilities (see constraint v. above); substitution allows for switching between different commodities (eg replacing meat with fish) or input origins (eg replacing domestically produced with imported inputs.
6. decision-makers’ priority horizon ; allows continuous switching between globally- (, absolute disruptions) and nationally-focused (, relative disruptions) priorities. Penalising absolute disruptions implies that small economies could undergo large changes at the cost of preserving large countries’ structures, whilst penalising relative disruptions focuses on all countries equally, irrespective of size. The former option would reflect absolute geopolitical power of large economies over small ones, whilst the latter emphasises the sovereignty of each country in safeguarding their economy.
7. decision-makers’ loss aversion with (see *SI* 2 for asymmetric penalty curve shapes); loss aversion facilitates that gains attract less penalty than losses[25](#_ENREF_25), and that small gains are rewarded.

For the above parameter space, we minimise the penalties as a function of .


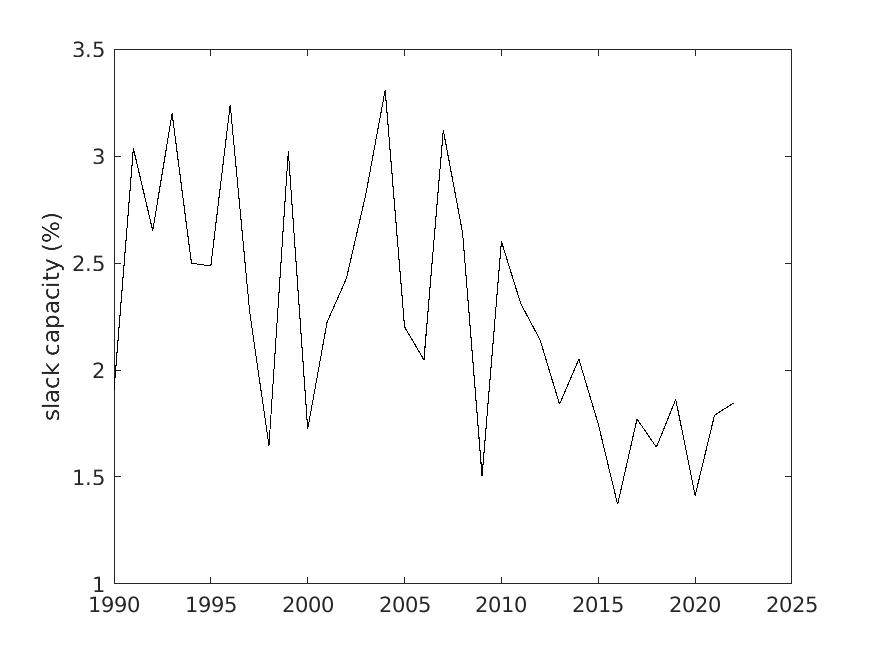

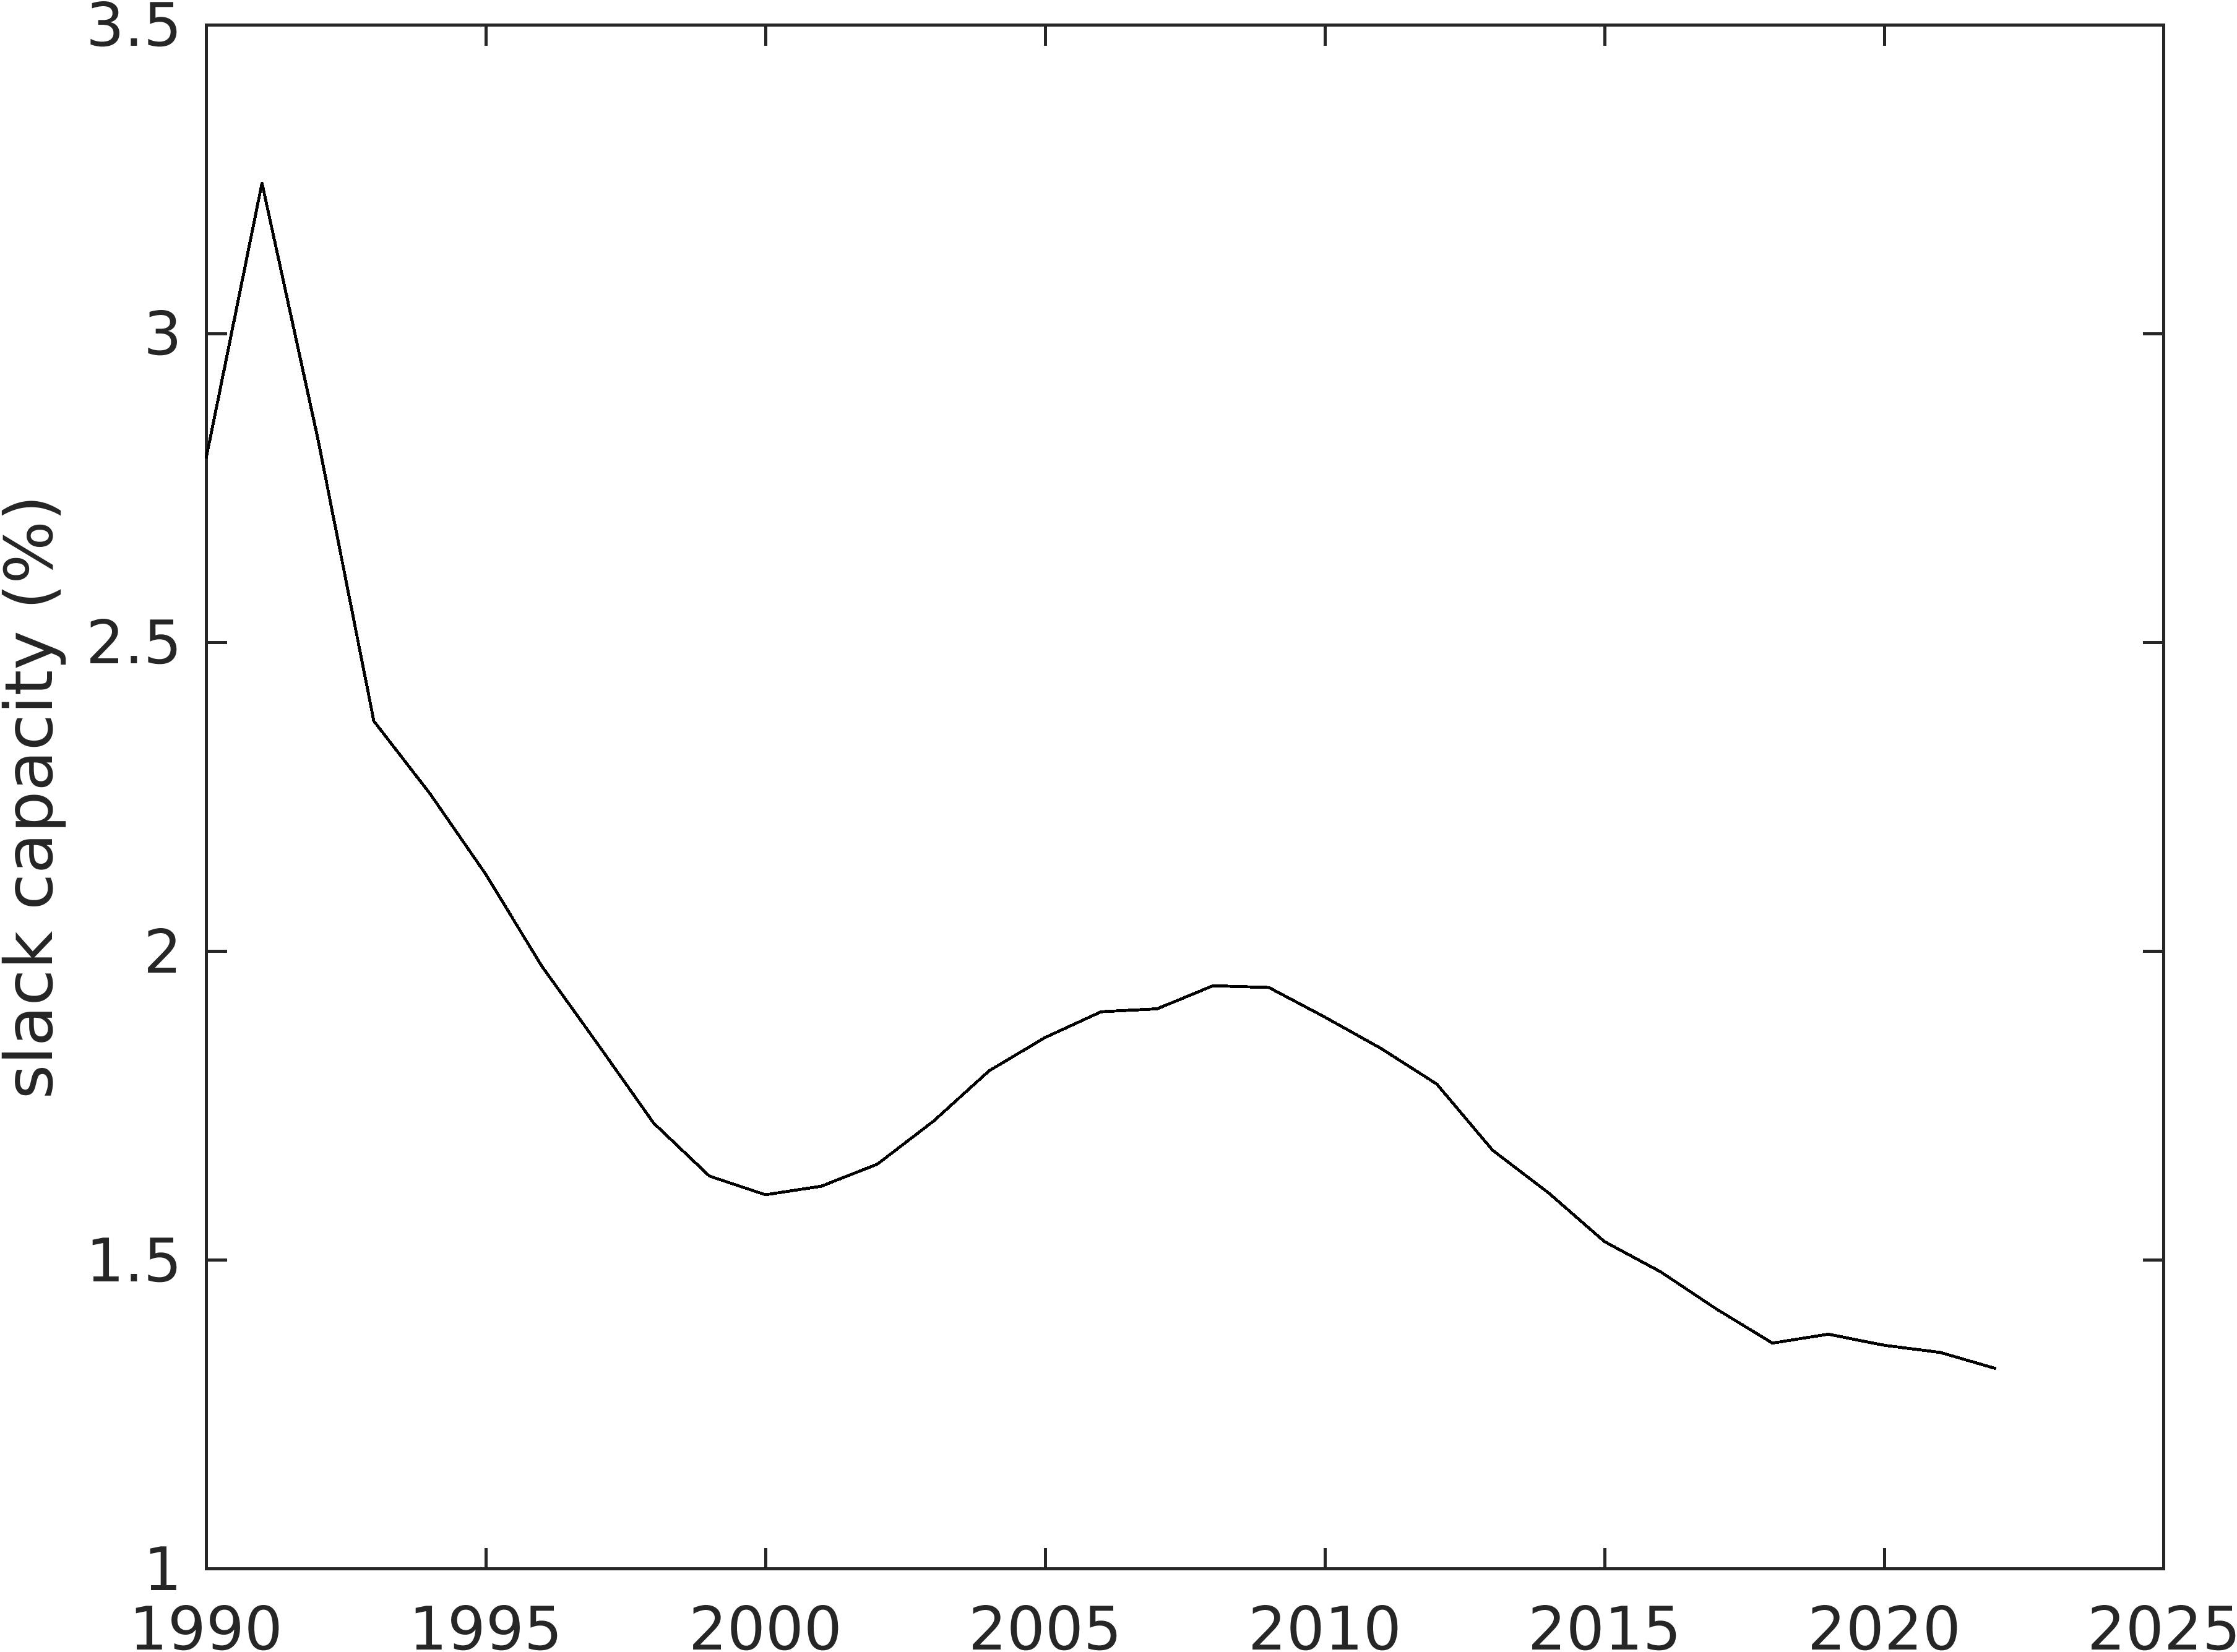


Fig. *SI* 1.5: Slack capacity (in units of %) over time.

Notes: Derived as the quotient of changes in inventories and total output, from the GLORIA MRIO database[32](#_ENREF_32). Main figure smoothed version; insert unsmoothed version.

## *SI 1.6 Future crop yield assessments*

There are a number of assessments of global crop yields under future climate change. Here we describe two more recent examples of those assessments.

Li *et al*. combine a crop yield response database (CGIAR) with climate model data from the 6th Coupled Model Intercomparison Project (CMIP6) and Global Circulation Models (GCMs) to estimate yield responses to climatic factors.{Li, 2025 #7467} CGIAR comprises more than 8,800 point observations as a function of temperature, rainfall, CO2 concentration, amongst others. Li *et al*. apply statistical models to arrive at fitted temperature-anomaly-yield response functions, for the four staple crops wheat, maize, rice, and soybeans. The authors distinguish mean yield changes, as well as low and high values separated from the means by one standard deviation.

Hasegawa *et al*. publish a global dataset comprising 8,703 crop-yield simulations derived from 202 studies published between 1984 and 2020.[22](#_ENREF_22) The dataset includes yield projections for wheat, maize, rice, and soybeans across 91 countries under major climate emission scenarios, providing a solid basis for a quantitative assessment of the impacts of climate change on crop production. It also contains geographical coordinates along with current and projected temperature and precipitation data, considering both scenarios with and without adaptation measures. The authors distinguish projections with and without adaptation, with the latter representing an upper-bound estimate of potential climate impacts on crop yields.

Hultgren *et al*.{Hultgren, 2025 #7501} estimate global crop yield impacts due to climate change, taking into account both adaptation benefits and costs. Using current global cropland distributions, the authors finds that all major crops except rice are likely to experience yield declines by 2050 under a high-emissions scenario. By the end of the century, projected yield losses under the high-emissions scenario (RCP 8.5) and the moderate-emissions scenario (RCP 4.5) are substantial for most crops: maize yields are expected to decline by 27.8% (RCP 8.5) and 12.0% (RCP 4.5), soybean by 35.6% and 22.4%, cassava by 29.8% and 12.8%, sorghum by 21.7% and 5.9% (RCP 4.5), and wheat by 28.2% and 13.5%. Rice is the only exception, with smaller estimated losses of 6.0% and 1.1%.

In this work we use Li *et al*.‘s high yield change values, because i) they largely agree with Hasegawa *et al*.’s data without adaptation (Figs. 1.6.1 and 1.6.2), and ii) they are more recent estimates. Taking estimates without adaptation also reduces reliance on uncertain assumptions about future adaptation strategies, allowing our assessment to clearly identify areas of greatest vulnerability.


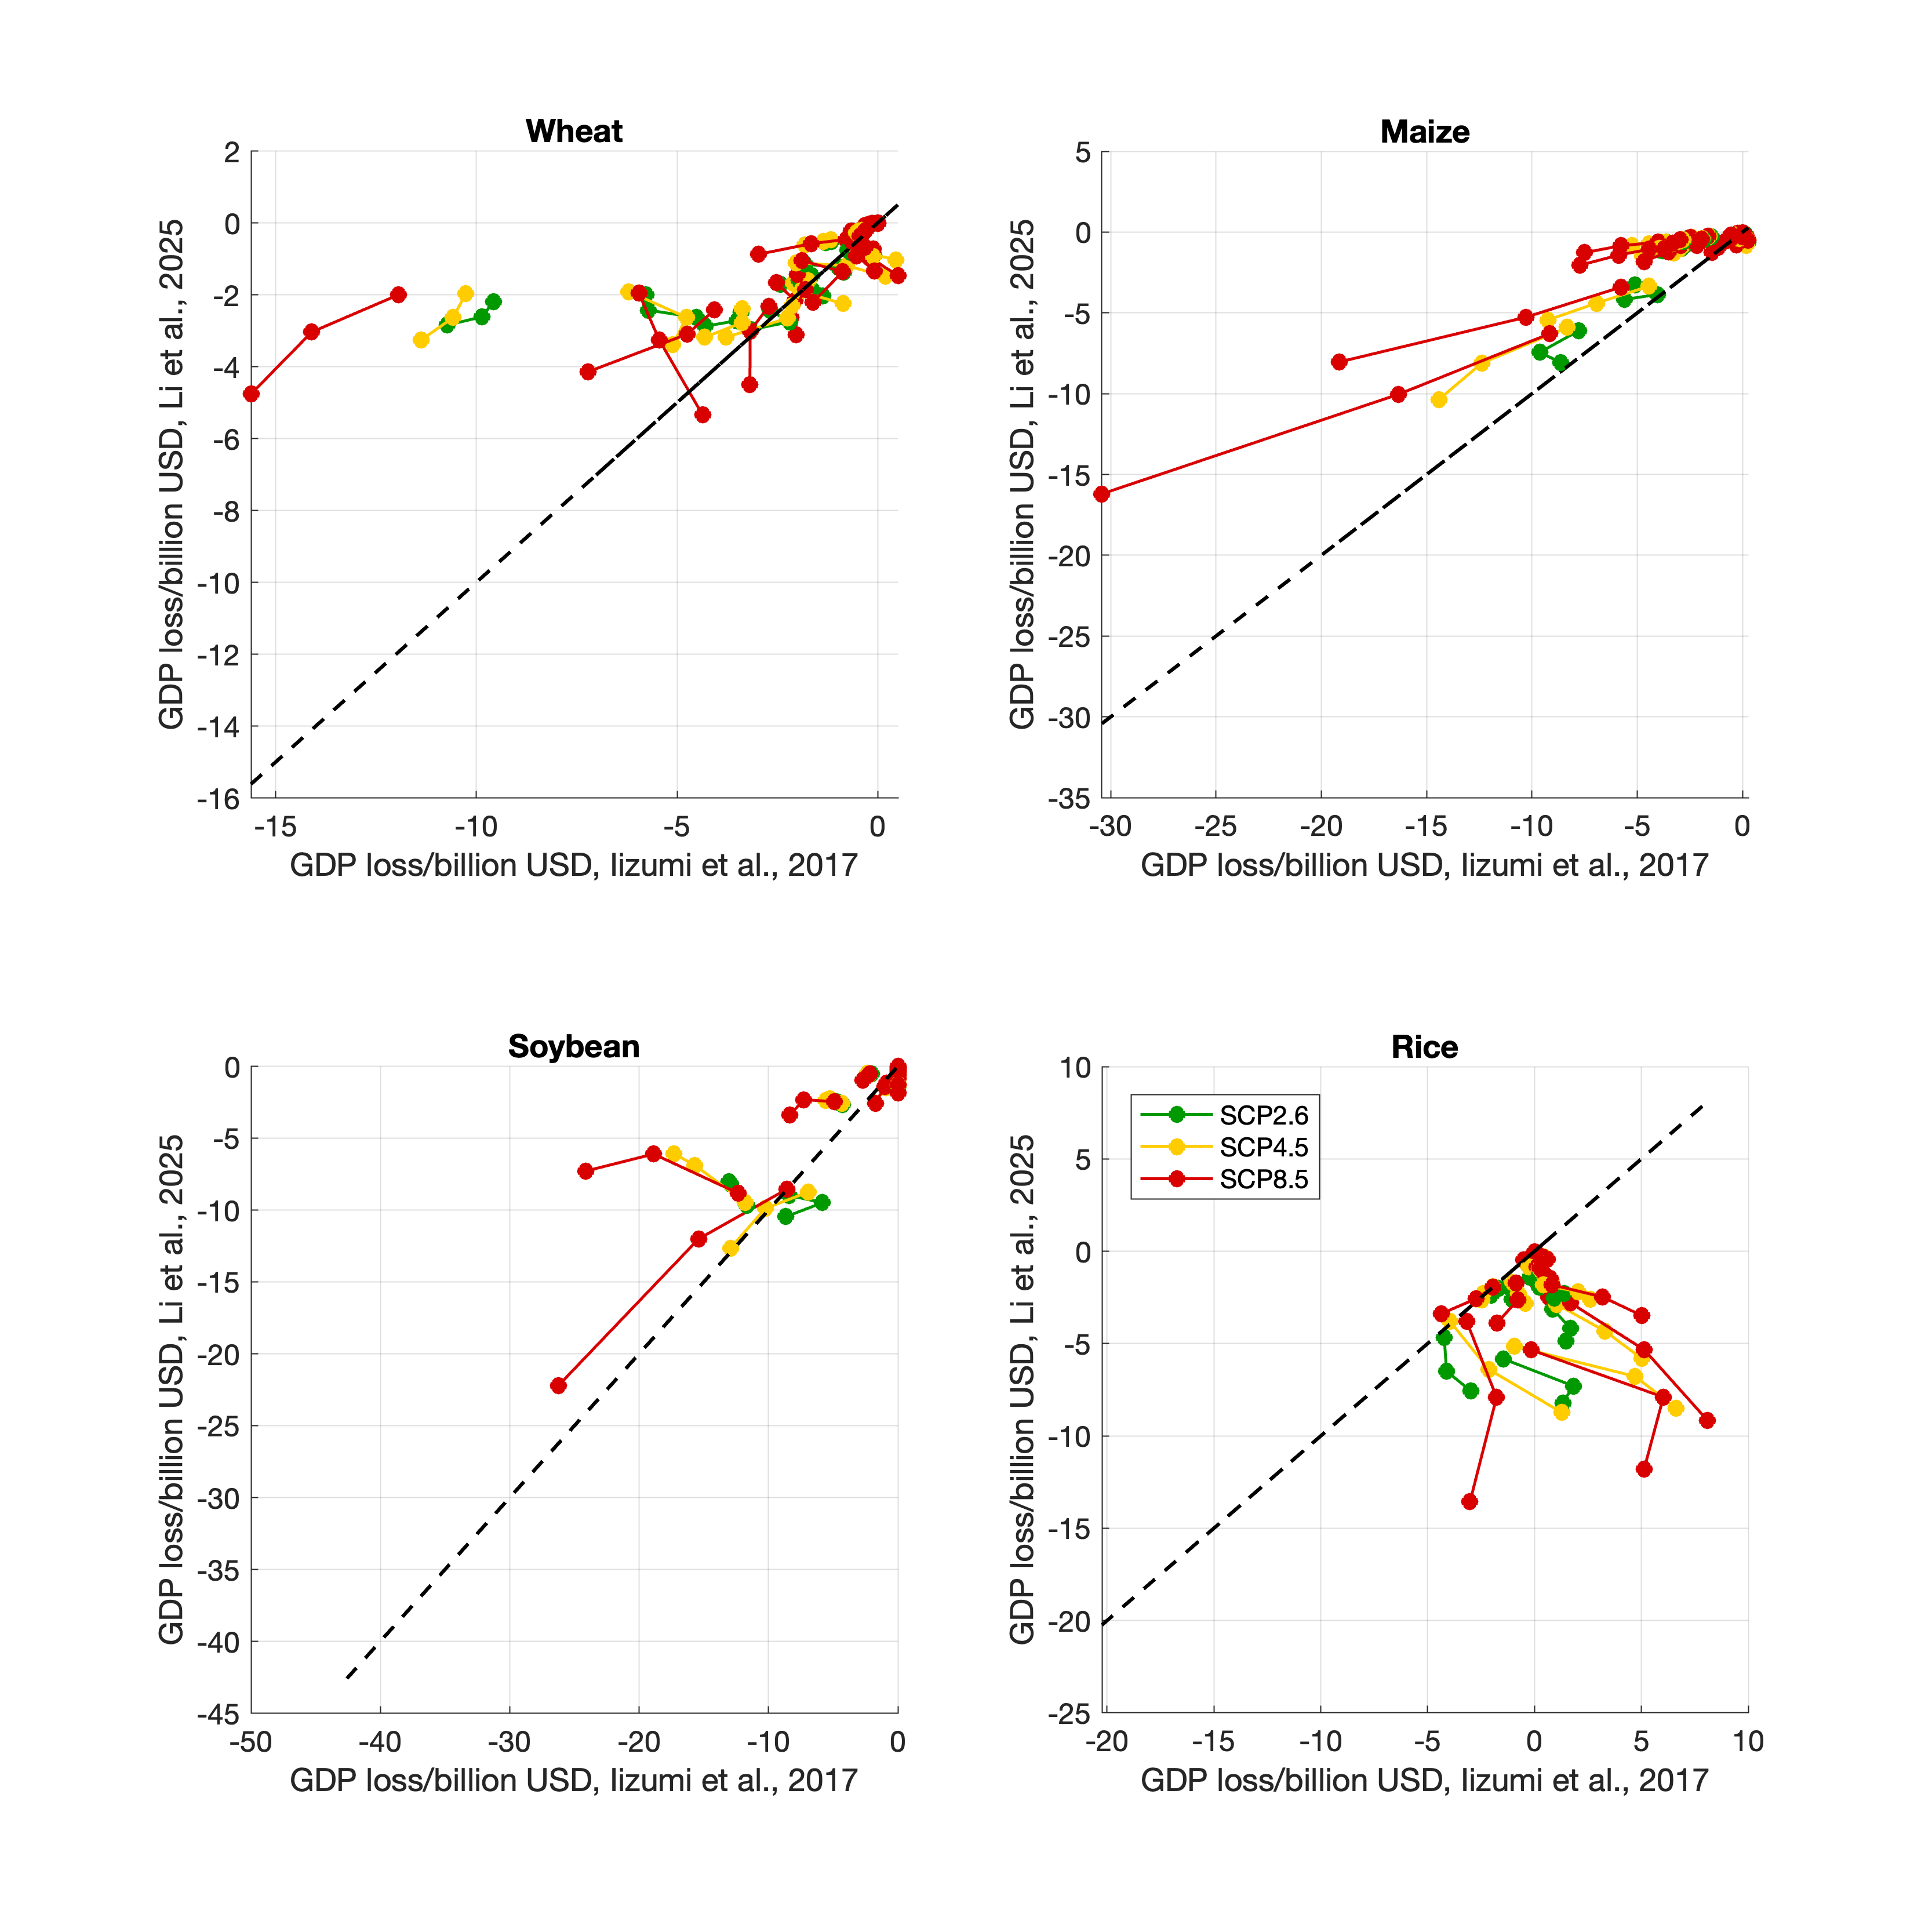


Fig. *SI* 1.6.1: Comparison of two future yield change studies.[22](#_ENREF_22){Li, 2025 #7467}


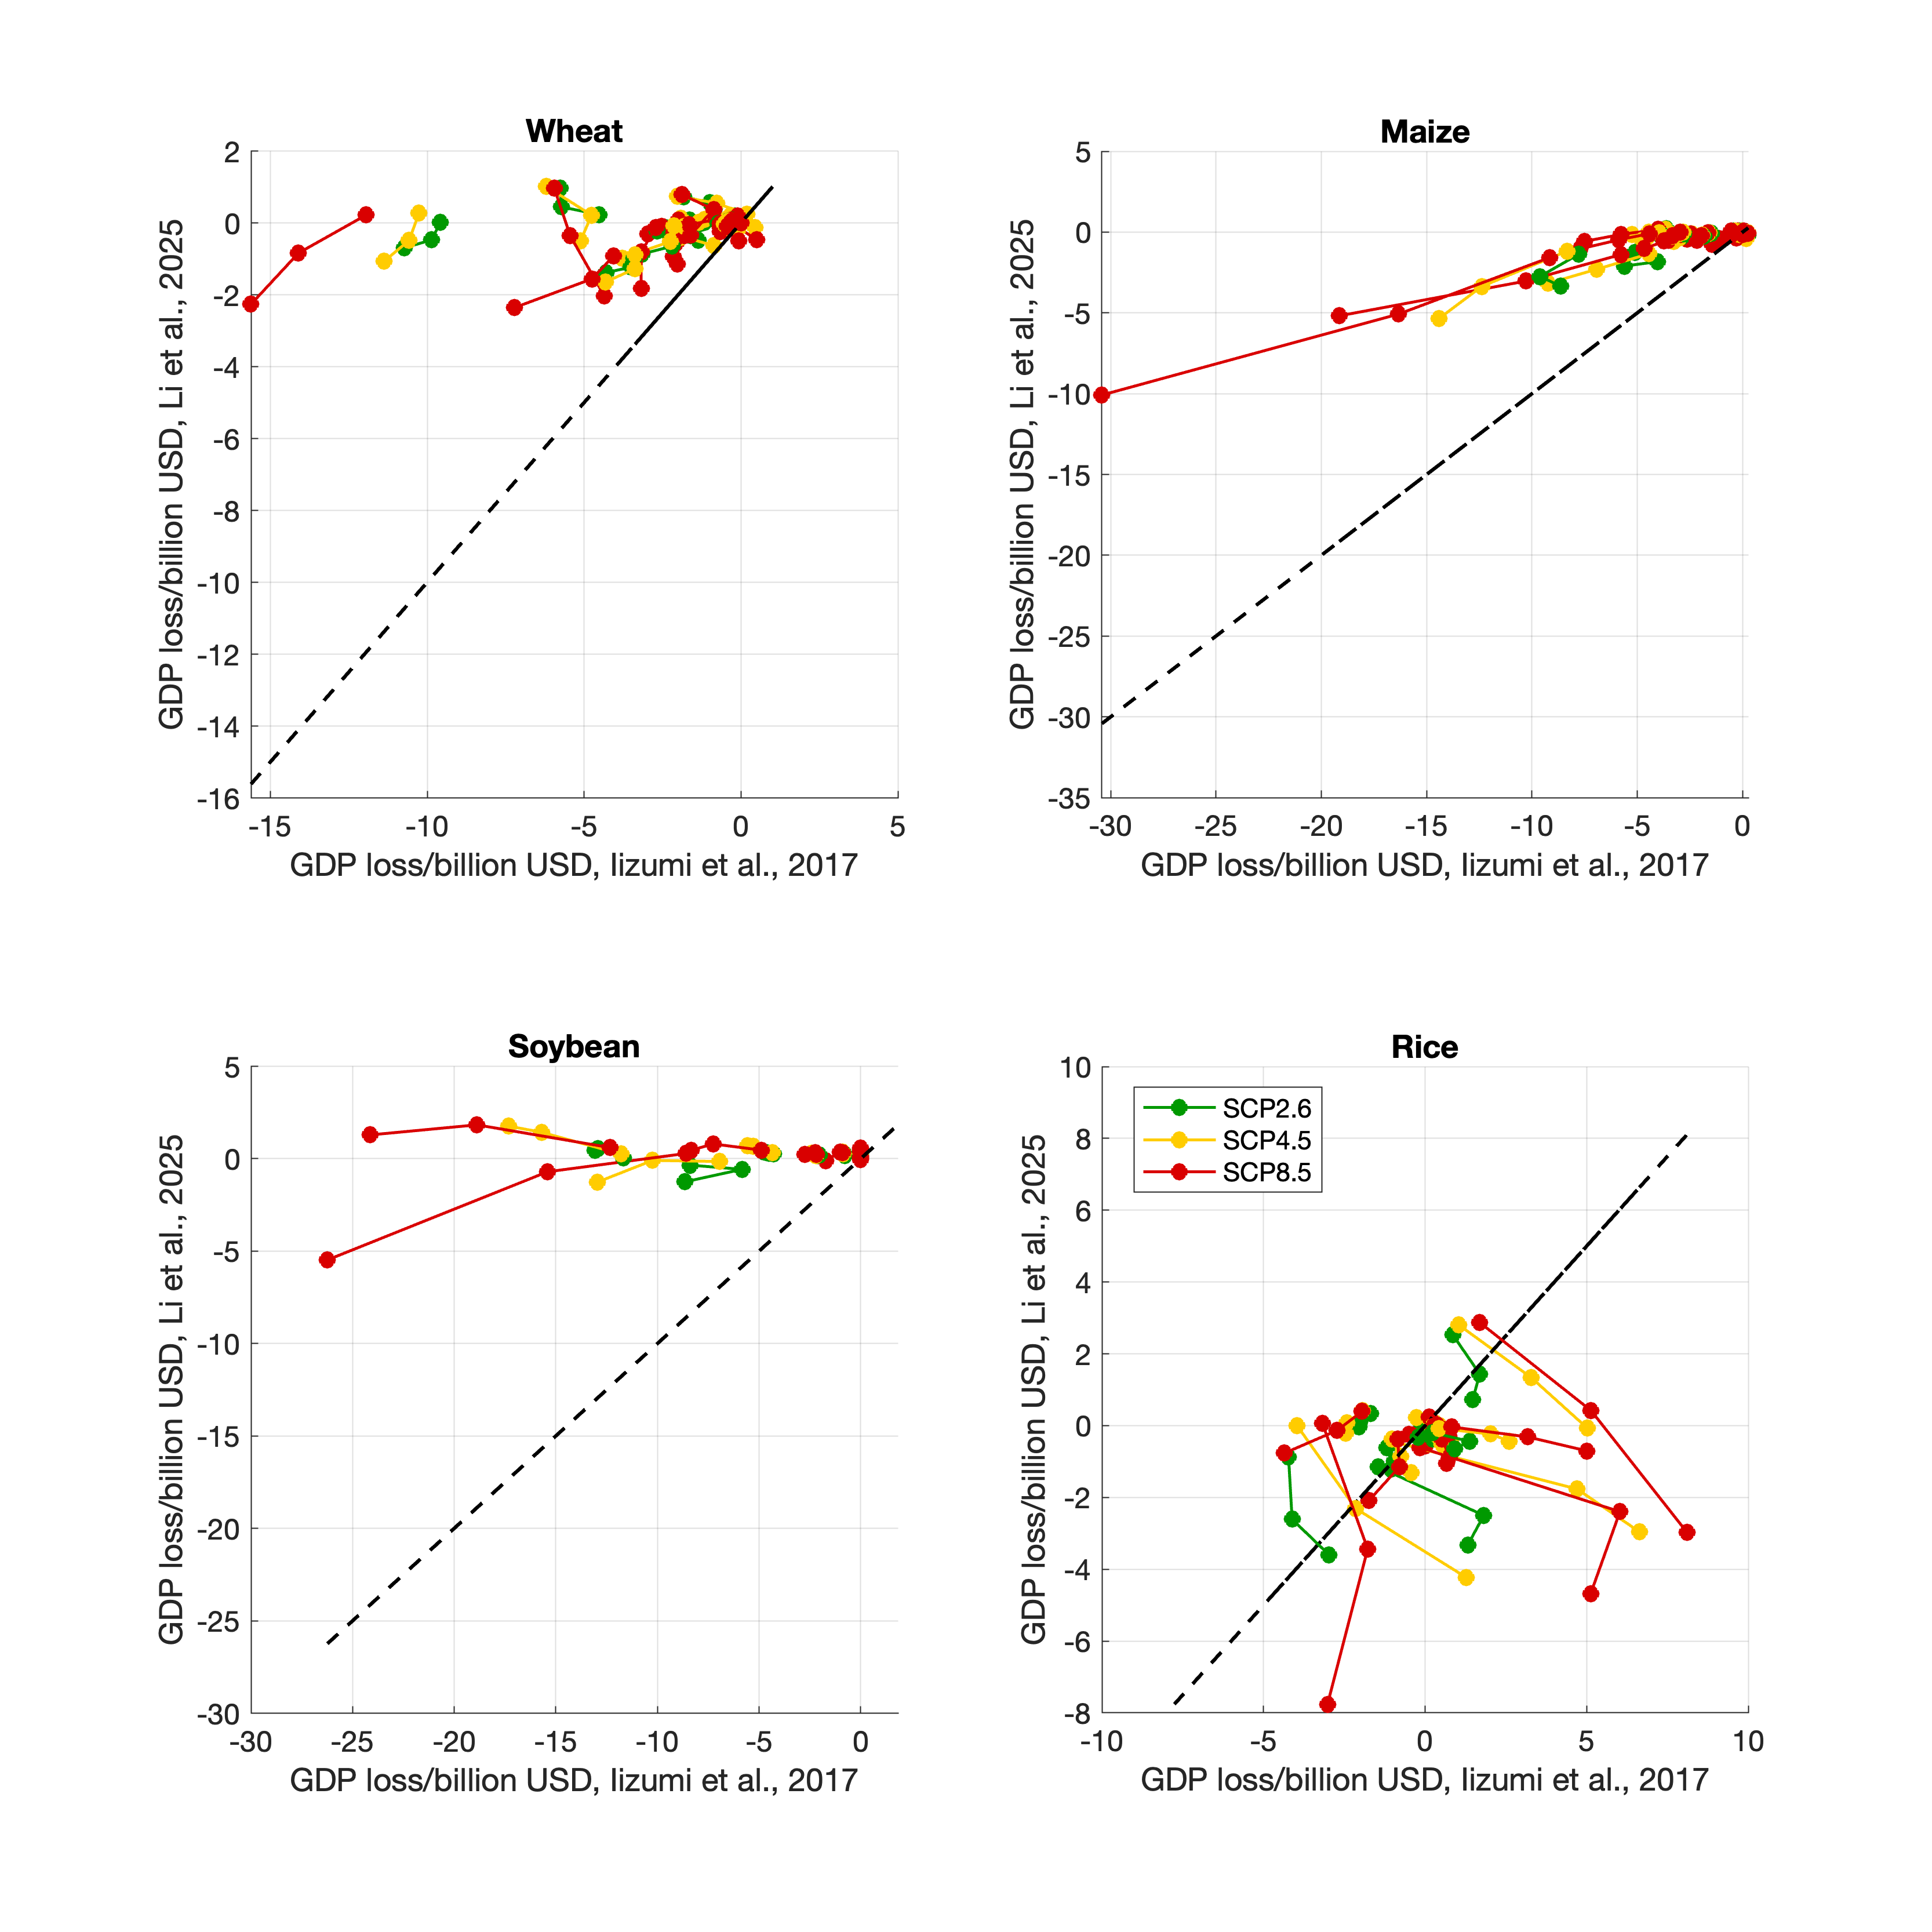


Fig. *SI* 1.6.2: Comparison of two future yield change studies.[22](#_ENREF_22){Li, 2025 #7467} Li’s mean values.

## *SI 1.7 Assessing production recipe flexibility*

We estimate production recipe flexibility (see constraint v.) by analysing historical changes in input-output coefficients , which represent the share of each input used per unit output in industry sectors. Specifically, we calculate ​ over different time windows (e.g. 2, 5, 10, 20, 25, or 33 years) using the GLORIA, OECD and FIGARO MRIO databases. These empirical changes provide a proxy for how much production structures have adapted in the past. The resulting standard deviations ​ serve as candidate values for the  in our disruption model. Standard deviations for the can then be derived via error propagation.

However, when applying empirically observed long-term high flexibility values (e.g. 20–50% over 30 years; Fig. 1.7), an input-output-based disruption model tends to project very limited economic damage from even substantial shocks.[33](#_ENREF_33),[34](#_ENREF_34) This raises the question: Are these empirically derived past flexibility estimates too optimistic for a future world disrupted by climate change? How much can input-output coefficients  realistically change over multi-decadal horizons under climate-induced stress?

Although the measured changes in input-output coefficients over past decades are empirically grounded, they reflect an idealised adaptation context. We use the term idealised not because the data are inaccurate, but because the conditions under which these structural shifts occurred were favourable compared to what is expected under severe climate stress.

First, past changes were not forced by crisis. Most shifts in input-output structure over the past 25–30 years were driven by benign forces: technological upgrading, globalization, outsourcing, capital investment, and policy liberalisation. These transitions unfolded in macroeconomic environments marked by relative political stability, global trade integration, and consistent economic growth. They occurred with time, capital, and policy support, not under pressure to substitute scarce or collapsing inputs in short timeframes.

Second, future adaptation will be constrained by physical, institutional, and systemic stress. Under scenarios such as RCP4.5 or RCP8.5, declining agricultural yields, water scarcity, heat stress, and extreme weather will coincide with global supply chain frictions, social unrest, and governance challenges. Adaptive changes that were once smooth may now be costly, contested, or infeasible. Key infrastructure may degrade, labour productivity may fall, and coordination failures may delay necessary transitions. These constraints significantly reduce the feasible rate of structural change in production recipes.

Third, technological substitutability has limits. While digitalisation and innovation can support production recipe reconfiguration, sectors dependent on biophysical constraints, such as food, energy, and water, will face hard boundaries.





Fig. *SI* 1.7: Production recipe flexibility (in units of %) as a function of input coefficient magnitude.

Notes: Derived as the standard deviations of **A** matrix coefficients (*SI* 1.1) between 1990 and 2022, with time windows varying between 2 and 33 years, from the GLORIA MRIO database[32](#_ENREF_32). Linear fits in red (OLS) and green (WLS), logarithmic fits in purple (OLS) and blue (WLS).

For these reasons, historical ​ reflect what is possible in theory, not necessarily feasible under duress.

A growing body of literature highlights the importance of reduced substitution and adaptive flexibility under stress conditions such as climate change or systemic disruptions. Adaptive mechanisms such as substitution, input reallocation, and temporary policy interventions can significantly mitigate economic losses; without such resilience mechanisms, losses from trade and labour disruptions would be far more severe.[34](#_ENREF_34) As substitution elasticities decrease, abatement costs tend to rise non-linearly, suggesting that economies with less flexible production structures face steeper costs in transitioning to low-carbon pathways. [33](#_ENREF_33)

Given these considerations, historical input-output coefficient changes should be treated as upper bounds. For modelling under climate duress, it is prudent to scale down these empirical values to reflect structural frictions, physical limits, and socio-political constraints. While the literature confirms reduced flexibility under stress, it offers no consensus on numerical values. Conservative scenario design and sensitivity testing remain the best available tools for approximating future economic adaptability.

## *SI 1.8 Producers’ and consumers’ losses – the total differential*

Producers’ and consumers’ losses are calculated from total losses , where is the Leontief inverse and is final demand (*SI* 1.1). Taking the Marshall-Edgeworth decomposition form[35](#_ENREF_35) of the total differential yields , with , , , and . enumerates changes in intermediate demand and reflects producers’ losses, whilst enumerates changes in final demand and reflects consumers’ losses.

## *SI 1.9 Production layers*

Unravelling the total differential using the series expansion[36](#_ENREF_36) of the Leontief inverse yields

.

Decomposing this series expansion via the Marshall-Edgeworth scheme yields

(final demand changes)

, (intermediate demand changes)

with and .

The term captures the immediate (1st-order) effects of the direct hit on final demand, that is mainly consumers in households. represents the consequences of these immediate effects on those producers that directly supply consumers (so-called 2nd-order consumer effects). describes the consumer effects on suppliers of suppliers, and so on.

Similarly, the terms , , and so on capture the 1st-, 2nd- and higher-order producer effects of the direct hit. The various order of the series expansion are interpreted as *production layers* of the supply-chain network.

## *SI 1.10 Structural paths*

We apply Structural Path Analysis (SPA)[37-39](#_ENREF_37) to the production layer expansion in Section *SI* 1.8. Because here, SPA acts on a differential form, it is termed Structural Path Decomposition (SPD) in the literature.[40](#_ENREF_40)


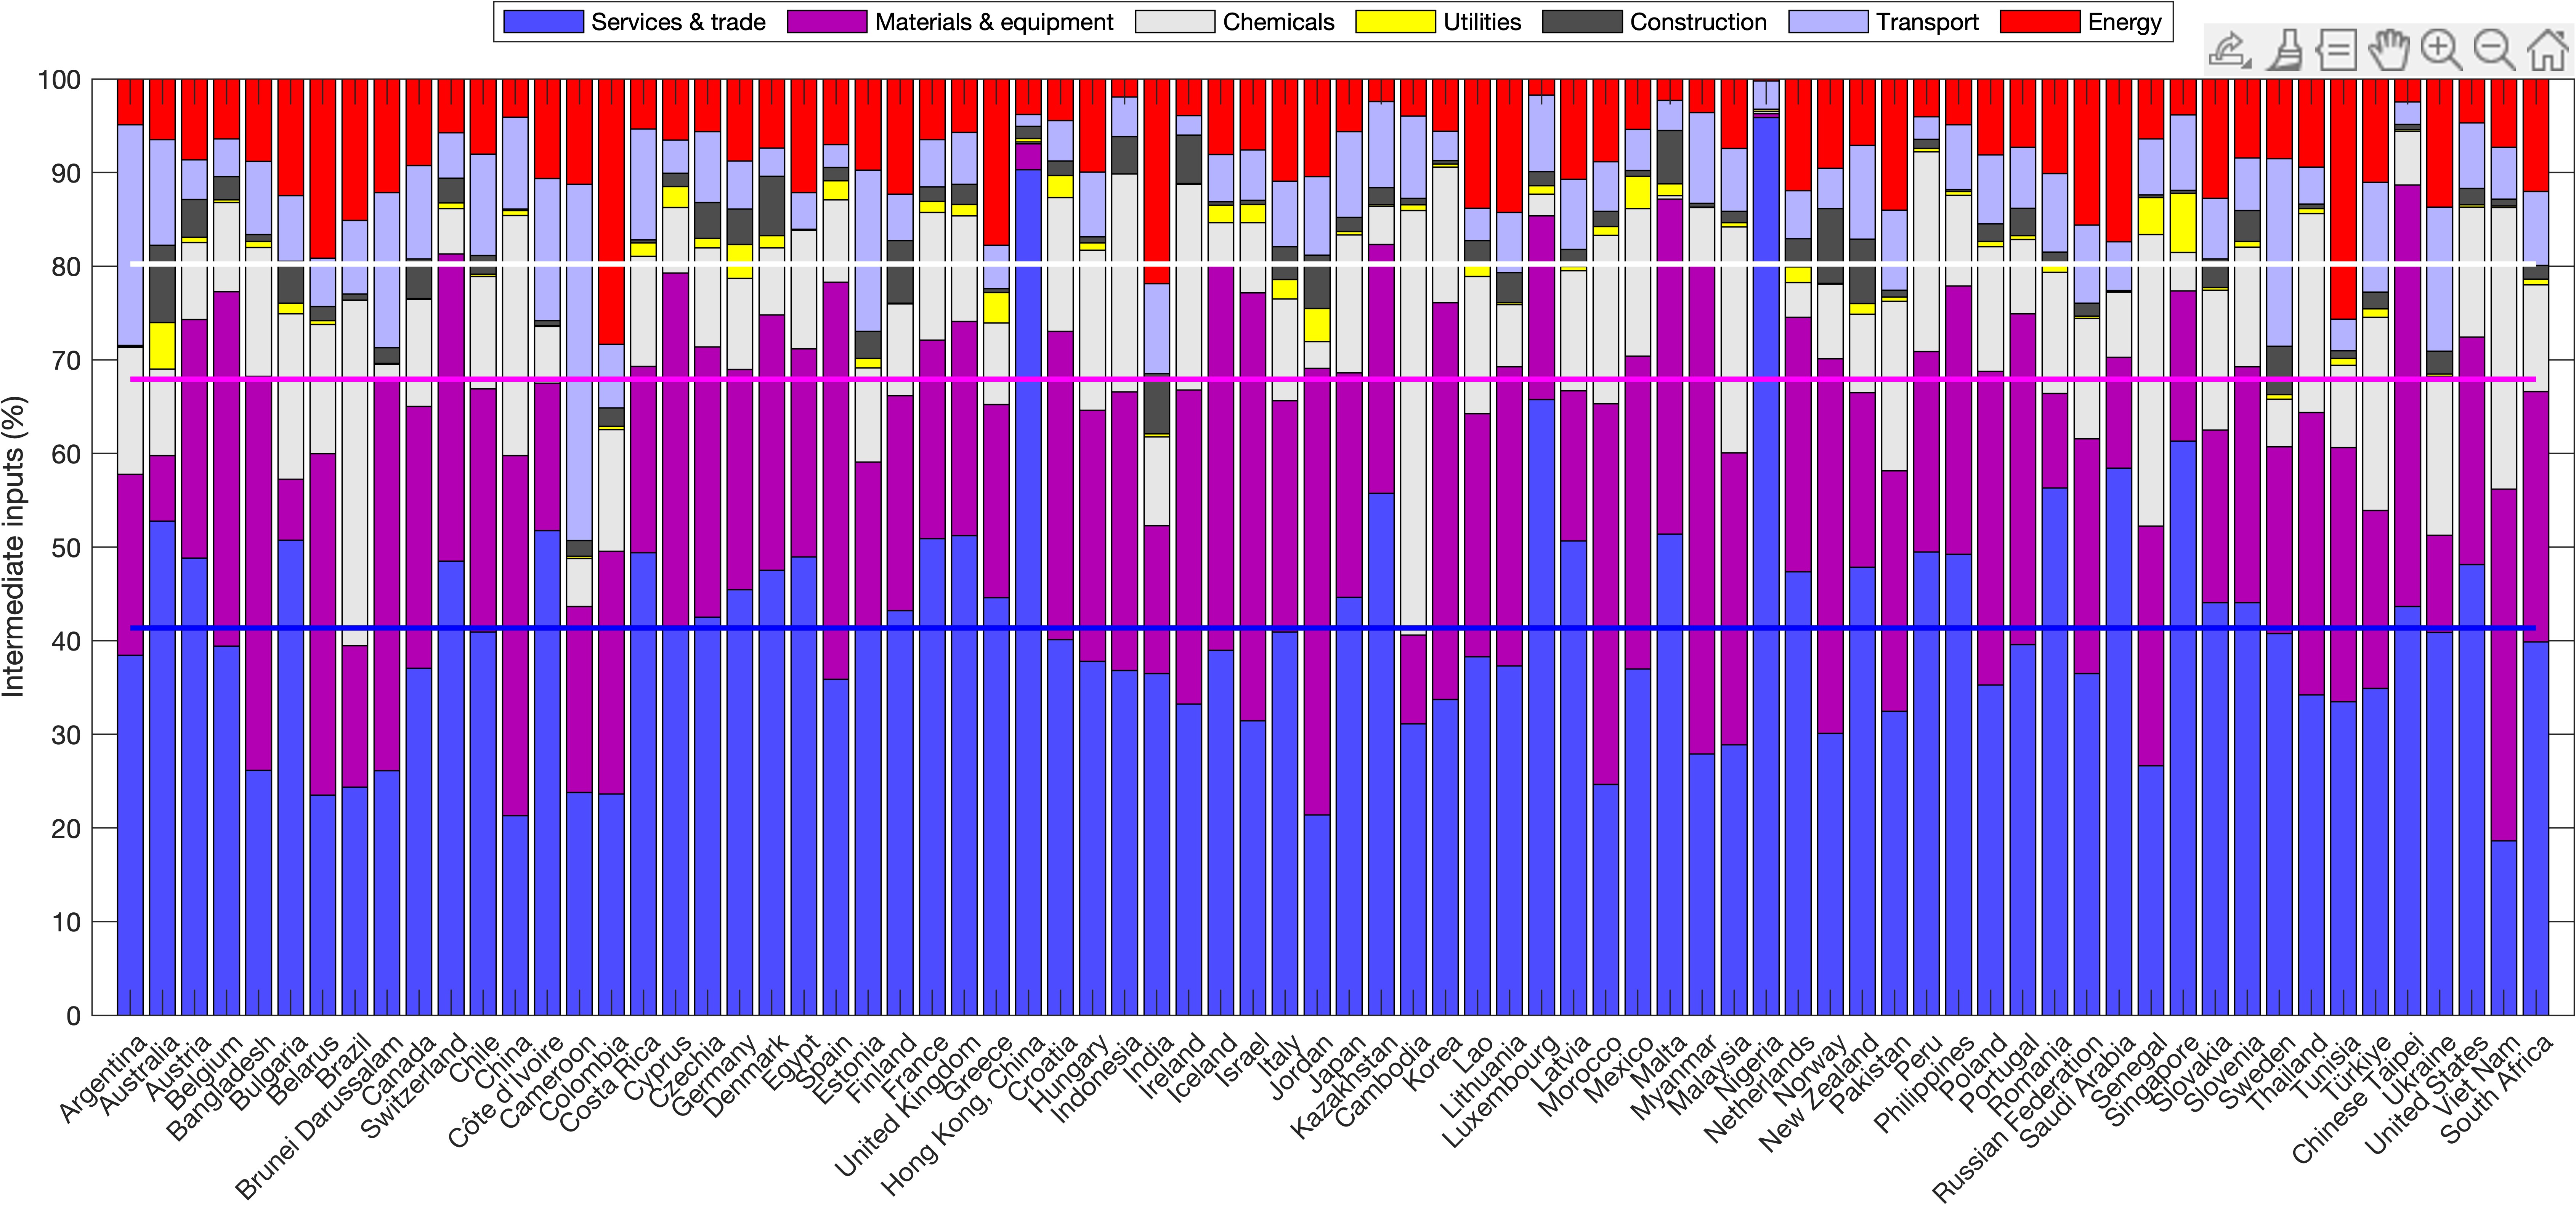


Fig. *SI* 1.10: Production recipe for agriculture in 76 countries.

Notes: Taken for the year 2020 from the OECD Inter-Country Input-Output tables.[41](#_ENREF_41) On average, services represent about 40% of intermediate inputs (blue solid line), materials and equipment another 30% (purple line), and chemicals another 10% (white line).

# SI 2: Mixed- (1st- and 2nd-) order polynomial disruption function


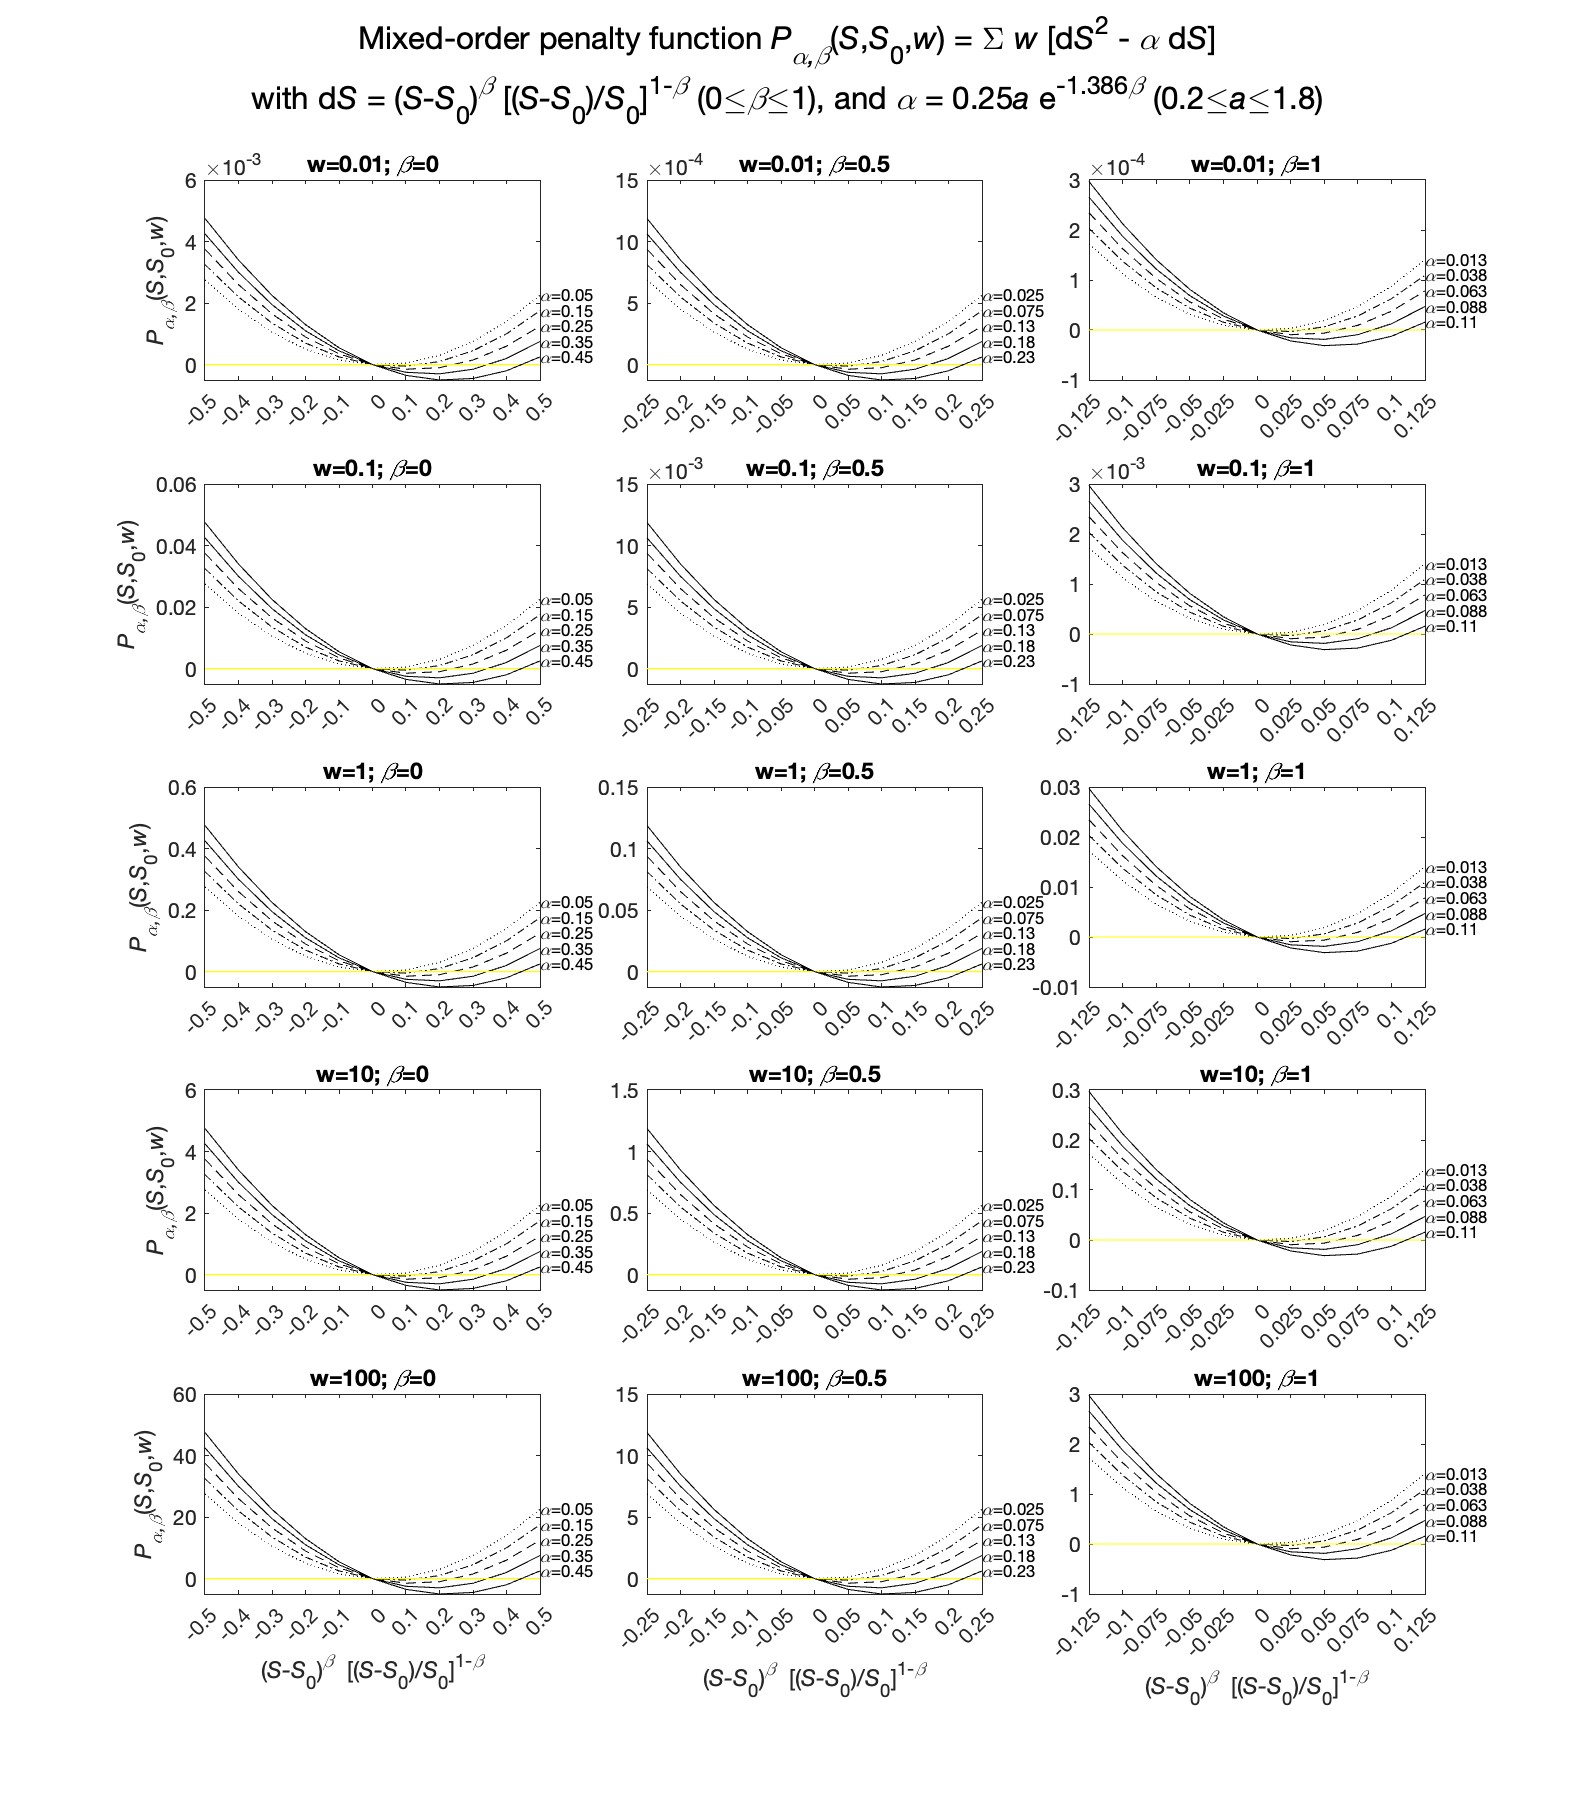


Fig. *SI* 2.1: as a function of , and parametrised by the priority weights *w*, the loss-aversion shape factor *a*, and the penalty control

| SI 3: Literature comparison | | | | | | | | |
| --- | --- | --- | --- | --- | --- | --- | --- | --- |
| **Ref** | | **Title** | **Event** | **Sectors / variable** | **Time** | **Main result** | **Method** | **Indirect eff.** |
| [42](#_ENREF_42) | Influence of extreme weather disasters on global crop production | | Droughts and extreme heat | Cereals, harvest area | 1964–2007 | ~10% total loss during past 50 years; | Statistical method | no |
| [43](#_ENREF_43) | Future warming increases probability of globally synchronized maize production shocks | | Global warming | Maize vs global warming | 21st century | 7% under 2°C warming and 86% under 4°C warming, per year | Regression model | no |
| [44](#_ENREF_44) | Risks of synchronized low yields are underestimated in climate and crop model projections | | Heatwaves | Maize and wheat | 1960–2014 | >one wave event lead to 7% in EAS, −6% to in NA and −3% in EEU. | Statistical method | no |
| [45](#_ENREF_45) | Amplified Rossby waves enhance risk of concurrent heatwaves in major breadbasket regions | | Heatwaves | Maize, wheat, soybean and rice | n/a | 4% reductions in production, regional decreases of up to 11% | Statistical method | no |
| [46](#_ENREF_46) | Global impacts of heat and water stress on food production and severe food insecurity | | Heat and water stress | Cereal crops (rice, soybean, maize, and wheat) | n/a | 6%, 10%, and 14% to 2050 for RCP4.5-SSP2, RCP8.5-SPP2, and RCP8.5-SSP3 | CGE | no |
| [47](#_ENREF_47) | Global supply chains amplify economic costs of future extreme heat risk | | Heat stress | Economic losses caused by heat stress on human activities | to 2060 | By 2060, economic losses 0.6–4.6%; attributed to health (37–45%), labour (18–37%) and indirect (12–43%) | Hybrid input–output and CGE | based on VA losses |
| [48](#_ENREF_48) | The economic commitment of climate change | | Global warming | Labour and agricultural productivity, temperature variability effect on agricultural productivity and health, precipitation effect on agricultural productivity, labour outcomes and flood damages | next 26 years to 2050 | 19% in 26 years | Statistical method | no |
| [49](#_ENREF_49) | A meta-analysis of the total economic impact of climate change | | Global warming | n/a | n/a | 1% GDP losses for each °C of additional warming | Meta analysis | no |
| [50](#_ENREF_50) | Reconciling widely varying estimates of the global economic impacts from climate change | | Global warming | Refs 1,5,6,12,13,14,15 | n/a | Up to 68% GDP loss | Statistical modelling | no |
| [51](#_ENREF_51) | Dependence of economic impacts of climate change on anthropogenically directed pathways | | Global warming | Impact of changes in (1) agricultural productivity, (2) undernourishment, (3) heat-related excess mortality, (4) cooling/heating demand, (5) occupational-health cost, (6) hydroelectric power generation capacity, (7) thermal power generation, (8) fluvial flooding and (9) coastal inundation | 2100 | 6.6% GDP loss in 2100 | Bottom up | no |
| [52](#_ENREF_52) | Climate damage projections beyond annual temperature | | Temperature means and variability, rainfall patterns and extreme precipitation | | n/a | 10% loss for 3°C warming | Statistical modelling | no |
| [53](#_ENREF_53) | The Macroeconomic Impact of Climate Change: Global vs. Local Temperature | | Global warming | Damage functions | n/a | 12% GDP loss for 1°C warming | Statistical modelling | no |
| [54](#_ENREF_54) | Temperature increase reduces global yields of major crops in four independent estimates | | Global warming | Wheat, rice, maize, and soybeans | n/a | 1°C warming = wheat by 6.0%, rice by 3.2%, maize by 7.4%, and soybean by 3.1% | statistical modelling + bottom up | no |
| [55](#_ENREF_55) | The impact of 1.5 °C and 2.0 °C global warming on global maize production and trade | | Global warming | Maize | n/a | 10.8% yield changes = 2°C | crop model + price model | no |
| [26](#_ENREF_26) | A global dataset for the projected impacts of climate change on four major crops. | | | Maize, rice, soybean, and wheat | 1984 and 2020 | Dataset | Meta-analyses | no |
| [56](#_ENREF_56) | Global economic impact of weather variability on the rich and the poor | | Temperature and rainfall | Agriculture, manufacturing and services / consumption risk | 2010-2040 | Up to 1% consumption risk (90th %ile of consumption losses) by 2040 | Agent-based global supply-chain model | total & direct loss |

# SI 4: Supplementary results


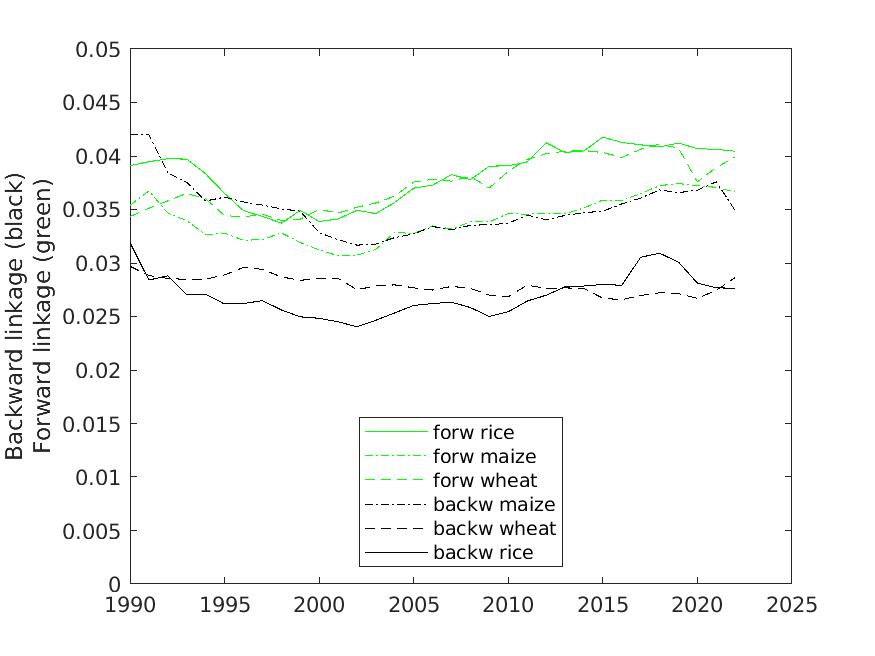


Fig. *SI* 4.1: Backward (black) and forward (green) linkages of the wheat (dashed), maize (dot-dashed) and rice (solid) sectors in the global economy between 1990 and 2022.

Notes: Forward linkages refer to the connections an industry has with downstream sectors that use its products as inputs, fostering industrial expansion and value chain development. Backward linkages, on the other hand, involve a sector's reliance on upstream suppliers, stimulating demand for raw materials, intermediate goods, and services, which supports local economic growth and industrialization.[57-63](#_ENREF_57) Rice and wheat are mainly destined for the final consumption of households, hence their forward linkages are stronger than those of maize, which is used in animal feed, biofuels, industrial products, pharmaceuticals, and beverage production, making it a highly versatile crop. Maize has stronger backward linkages than rice and wheat because it relies more on commercial inputs like hybrid seeds, fertilizers, pesticides, and mechanized equipment. Additionally, its integration with agribusiness, use in livestock feed and biofuels, and adaptability to diverse climates drive higher demand for upstream industries, reinforcing its backward linkages. Data derived[64](#_ENREF_64) from the Leontief inverse (*SI* 1.1) as (backward) and (forward) using data from the GLORIA MRIO database[32](#_ENREF_32).

**References**

1 Lenzen, M. & Rueda-Cantuche, J. M. A note on the use of supply-use tables in impact analyses. *Statistics and Operations Research Transactions* **36**, 139-152 (2012).

2 Koks, E. E. & Thissen, M. A Multiregional Impact Assessment Model for disaster analysis. *Economic Systems Research* **28**, 429-449, doi:10.1080/09535314.2016.1232701 (2016).

3 Okuyama, Y. Economic Modeling for Disaster Impact Analysis: Past, Present, and Future. *Economic Systems Research* **19**, 115-124, doi:10.1080/09535310701328435 (2007).

4 Okuyama, Y. & Santos, J. R. Disaster impact and input-output analysis. *Economic Systems Research* **26**, 1-12, doi:10.1080/09535314.2013.871505 (2014).

5 Galbusera, L. & Giannopoulos, G. On input-output economic models in disaster impact assessment. *International Journal of Disaster Risk Reduction* **30**, 186-198, doi:<https://doi.org/10.1016/j.ijdrr.2018.04.030> (2018).

6 Schulte in den Bäumen, H., Többen, J. & Lenzen, M. Labour forced impacts and production losses due to the 2013 flood in Germany. *Journal of Hydrology* **527**, 142-150, doi:<http://dx.doi.org/10.1016/j.jhydrol.2015.04.030> (2015).

7 Oosterhaven, J. & Többen, J. Wider economic impacts of heavy flooding in Germany: a non-linear programming approach. *Spatial Economic Analysis* **12**, 404-428, doi:10.1080/17421772.2017.1300680 (2017).

8 Xia, Y. *et al.* Assessing the economic impacts of IT service shutdown during the York flood of 2015 in the UK. *Proceedings of the Royal Society A: Mathematical, Physical and Engineering Sciences* **475**, 20180871, doi:doi:10.1098/rspa.2018.0871 (2019).

9 Zeng, Z., Guan, D., Steenge, A. E., Xia, Y. & Mendoza-Tinoco, D. Flood footprint assessment: a new approach for flood-induced indirect economic impact measurement and post-flood recovery. *Journal of Hydrology* **579**, 124204, doi:<https://doi.org/10.1016/j.jhydrol.2019.124204> (2019).

10 Mendoza-Tinoco, D. *et al.* Flood Footprint Assessment: A Multiregional Case of 2009 Central European Floods. *Risk Analysis* **40**, 1612-1631, doi:<https://doi.org/10.1111/risa.13497> (2020).

11 Lyu, Y., Xiang, Y. & Wang, D. Evaluating Indirect Economic Losses from Flooding Using Input-Output Analysis: An Application to China's Jiangxi Province. *Int J Environ Res Public Health* **20**, doi:10.3390/ijerph20054509 (2023).

12 Miller, R. E. & Blair, P. D. *Input-Output Analysis: Foundations and Extensions*. (Prentice-Hall, 2010).

13 Li, M., Lenzen, M., Pedauga, L. E. & Malik, A. A minimum-disruption approach to input–output disaster analysis. *Spatial Economic Analysis*, 1-25, doi:10.1080/17421772.2022.2056231 (2022).

14 Steenge, A. E. & Bočkarjova, M. Thinking about imbalances in post-catastrophe economies: An input–output based proposition. *Economic Systems Research* **19**, 205-223, doi:10.1080/09535310701330308 (2007).

15 Hallegatte, S. An adaptive regional input-output model and its application to the assessment of the economic cost of Katrina. *Risk Analysis* **28**, 779–799 (2008).

16 Schulte in den Bäumen, H., Moran, D., Lenzen, M., Cairns, I. & Steenge, A. How severe space weather can disrupt global supply chains. *Natural Hazards and Earth System Science* **14**, 2749-2759, doi:10.5194/nhess-14-2749-2014 (2014).

17 Rose, A. & Liao, S.-Y. Modeling Regional Economic Resilience to Disasters: A Computable General Equilibrium Analysis of Water Service Disruptions. *Journal of Regional Science* **45**, 75-112, doi:<https://doi.org/10.1111/j.0022-4146.2005.00365.x> (2005).

18 Faturay, F. *et al.* Using Virtual Laboratories for disaster analysis – A case study of Taiwan. *Economic Systems Research* **32**, 58-83 (2020).

19 Oosterhaven, J. On the limited usability of the inoperability IO model. *Economic Systems Research* **29**, 452-461, doi:10.1080/09535314.2017.1301395 (2017).

20 Oosterhaven, J. & Bouwmeester, M. C. A new approach to modeling the impacts of disruptive events. *Journal of Regional Science* **56**, 583-595, doi:10.1111/jors.12262 (2016).

21 Fahr, S., Senner, R. & Vismara, A. The globalization of climate change: amplification of climate-related physical risks through input-output linkages. Report No. No 2942, (European Central Bank, 2024).

22 Creedy, J. & Sleeman, C. Carbon dioxide emissions reduction in New Zealand: A minimum disruption approach. *Australian Economic Papers* **44**, 199-220, doi:10.1111/j.1467-8454.2005.00260.x (2005).

23 Cornwell, A. Reducing carbon dioxide emissions in Australia: a minimum disruption approach. *Australian Economic Review*, 65-81 (1996).

24 Proops, J. L. R., Faber, M. & Wagenhals, G. in *Reducing CO2 Emissions* 227-246 (Springer-Verlag, 1993).

25 Kahneman, D., Knetsch, J. L. & Thaler, R. D. The endowment effect, loss aversion, and status quo bias. *Journal of Economic Perspectives* **5**, 193-206 (1991).

26 Hasegawa, T. *et al.* A global dataset for the projected impacts of climate change on four major crops. *Scientific Data* **9**, 58, doi:10.1038/s41597-022-01150-7 (2022).

27 Duchin, F. & Levine, S. H. Sectors may use multiple technologies simultaneously: the rectangular choice-of-technology model with binding factor constraints. *Economic Systems Research* **23**, 281-302, doi:10.1080/09535314.2011.571238 (2011).

28 Nagurney, A. & Chen, H. K. An algorithm for the solution of a quadratic programming problem, with application to constrained matrix and price equilibrium problems. *Environment and Planning A* **21**, 99-114 (1989).

29 Nagurney, A. & Robinson, A. G. Algorithms for quadratic constrained matrix problems. *Mathematical and Computer Modelling* **16**, 53-65 (1992).

30 Harrigan, F. & Buchanan, I. A quadratic programming approach to input-output estimation and simulation. *Journal of Regional Science* **24**, 339-358 (1984).

31 Bernas, T., Asem, E. K., Robinson, J. P. & Rajwa, B. Quadratic form: A robust metric for quantitative comparison of flow cytometric histograms. *Cytometry Part A* **73A**, 715-726, doi:<https://doi.org/10.1002/cyto.a.20586> (2008).

32 Lenzen, M. & Li, M. The GLORIA Multi-Region Input-Output database. Report No. <https://ielab.info/resources/gloria>, (The University of Sydney, Sydney, Australia, 2025).

33 Lu, Y. & Stern, D. I. Substitutability and the Cost of Climate Mitigation Policy. *Environmental and Resource Economics* **64**, 81-107, doi:10.1007/s10640-015-9936-7 (2016).

34 Rose, A., Asay, G., Wei, D. & Leung, B. (2009).

35 Lenzen, M. Structural Decomposition Analysis and the Mean-Rate-of-Change Index. *Applied Energy* **83**, 185–198 (2006).

36 Waugh, F. V. Inversion of the Leontief matrix by power series. *Econometrica* **18**, 142-154 (1950).

37 Defourny, J. & Thorbecke, E. Structural path analysis and multiplier decomposition within a social accounting matrix framework. *Economic Journal* **94**, 111-136 (1984).

38 Khan, H. A. & Thorbecke, E. Macroeconomic effects of technology choice: multiplier and structural path analysis within a SAM framework. *Journal of Policy Modeling* **11**, 131-156 (1989).

39 Treloar, G. Extracting embodied energy paths from input-output tables: towards an input-output-based hybrid energy analysis method. *Economic Systems Research* **9**, 375-391 (1997).

40 Wood, R. & Lenzen, M. Structural path decomposition *Energy Economics* **31**, 335-341 (2009).

41 OECD. OECD Inter-Country Input-Output (ICIO) Tables. Report No. <https://www.oecd.org/sti/ind/inter-country-input-output-tables.htm>, (Organisation for Economic Co-operation and Development, Paris, France, 2022).

42 Lesk, C., Rowhani, P. & Ramankutty, N. Influence of extreme weather disasters on global crop production. *Nature* **529**, 84-87, doi:10.1038/nature16467 (2016).

43 Tigchelaar, M., Battisti, D., Naylor, R. & Ray, D. Future warming increases probability of globally synchronized maize production shocks. *Proceedings of the National Academy of Sciences* **115**, 201718031, doi:10.1073/pnas.1718031115 (2018).

44 Kornhuber, K. *et al.* Risks of synchronized low yields are underestimated in climate and crop model projections. *Nature Communications* **14**, 3528, doi:10.1038/s41467-023-38906-7 (2023).

45 Kornhuber, K. *et al.* Amplified Rossby waves enhance risk of concurrent heatwaves in major breadbasket regions. *Nature Climate Change* **10**, 48-53, doi:10.1038/s41558-019-0637-z (2020).

46 Kompas, T., Che, T. N. & Grafton, R. Q. Global impacts of heat and water stress on food production and severe food insecurity. *Scientific Reports* **14**, 14398, doi:10.1038/s41598-024-65274-z (2024).

47 Sun, Y. *et al.* Global supply chains amplify economic costs of future extreme heat risk. *Nature* **627**, 797-804, doi:10.1038/s41586-024-07147-z (2024).

48 Kotz, M., Levermann, A. & Wenz, L. The economic commitment of climate change. *Nature* **628**, 551-557, doi:10.1038/s41586-024-07219-0 (2024).

49 Tol, R. S. J. A meta-analysis of the total economic impact of climate change. *Energy Policy* **185**, 113922, doi:<https://doi.org/10.1016/j.enpol.2023.113922> (2024).

50 Morris, J. *et al.* Reconciling widely varying estimates of the global economic impacts from climate change. *Nature Climate Change* **15**, 124-127, doi:10.1038/s41558-024-02232-7 (2025).

51 Takakura, J. y. *et al.* Dependence of economic impacts of climate changeon anthropogenically directed pathways. *Nature Climate Change* **9**, 737-741, doi:10.1038/s41558-019-0578-6 (2019).

52 Waidelich, P., Batibeniz, F., Rising, J., Kikstra, J. S. & Seneviratne, S. I. Climate damage projections beyond annual temperature. *Nature Climate Change* **14**, 592-599, doi:10.1038/s41558-024-01990-8 (2024).

53 Bilal, A. & Känzig, D. The Macroeconomic Impact of Climate Change: Global vs. Local Temperature. *SSRN Electronic Journal*, doi:10.2139/ssrn.4826056 (2024).

54 Zhao, C. *et al.* Temperature increase reduces global yields of major crops in four independent estimates. *Proceedings of the National Academy of Sciences* **114**, 201701762, doi:10.1073/pnas.1701762114 (2017).

55 Li, K., Pan, J., Xiong, W., Xie, W. & Ali, T. The impact of 1.5 °C and 2.0 °C global warming on global maize production and trade. *Sci Rep* **12**, 17268, doi:10.1038/s41598-022-22228-7 (2022).

56 Quante, L., Willner, S. N., Otto, C. & Levermann, A. Global economic impact of weather variability on the rich and the poor. *Nature Sustainability* **7**, 1419-1428, doi:10.1038/s41893-024-01430-7 (2024).

57 McGilvray, J. in *Structure, System and Economic Policy* (ed W. Leontief) 49-56 (Cambridge University Press, 1977).

58 Cella, G. The input-output measurement of interindustry linkages. *Oxford Bulletin of Economics and Statistics* **46**, 73-84 (1984).

59 Harrigan, F. J. & McGilvray, J. The measurement of interindustry linkages. *Ricerche Economiche* **XLII**, 325-343 (1988).

60 Dietzenbacher, E. The measurement of interindustry linkages: key sectors in the Netherlands. *Economic Modelling* **9**, 419-437 (1992).

61 Guilhoto, J. & Hewings, G. J. D. (unpublished manuscript, 1995).

62 Sonis, M., Guilhoto, J. J. M., Hewings, G. J. D. & Martins, E. B. Linkages, key sectors, and structural change: some new perspectives. *Developing Economies* **33**, 233-270 (1995).

63 Dietzenbacher, E. & van der Linden, J. A. Sectoral and spatial linkages in the EC production structure. *Journal of Regional Science* **37**, 629-651 (1997).

64 Lenzen, M. Environmentally important linkages and key sectors in the Australian economy. *Structural Change and Economic Dynamics* **14**, 1-34 (2003).

1. Condition ii. is O&B’s Eq. 2. Condition iv. is on O&B’s p. 587, but no distinction is made for subsidies and decreases in inventories. Instead of our condition i., O&B model specific scenarios in Eqs. 7 and 8. Conditions iii. and v. do not appear in O&B. [↑](#footnote-ref-1)
